# Supplementary material for: Simultaneous separation and identification of all structural isomers and enantiomers of aminobutyric acid using a highly sensitive chiral resolution labeling reagent
Source: Royal Society of Chemistry journal article supplement (doi:10.1039/d3ay01665j), 2023-01-01
Supplement: d3ay01665j1.pdf [file d3ay01665j1.pdf]

## Supplementary information

# Simultaneous Separation and Identification of All Structural Isomers and Enantiomers of Aminobutyric Acid Using a Highly Sensitive Chiral Resolution Labeling Reagent

Makoto Ozaki<sup>a</sup>, Motoshi Shimotsuma<sup>a</sup>, Takefumi Kuranaga<sup>b</sup>, Hideaki Kakeya<sup>\*b</sup>,  
and Tsunehisa Hirose<sup>\*a</sup>

<sup>a</sup> Purification Section, Research and Development Department, Nacalai Tesque, Inc., Ishibashi Kaide-cho, Muko-shi, Kyoto 617-0004, Japan

<sup>b</sup> Department of System Chemotherapy and Molecular Sciences, Division of Medicinal Frontier Sciences, Graduate School of Pharmaceutical Sciences, Kyoto University, Yoshida, Sakyo-ku, Kyoto 606-8501, Japan

\*Corresponding author

E-mail: scseigyo-hisyo@pharm.kyoto-u.ac.jp (H. Kakeya)

E-mail: hirose-t@nacalai.co.jp (T. Hirose)

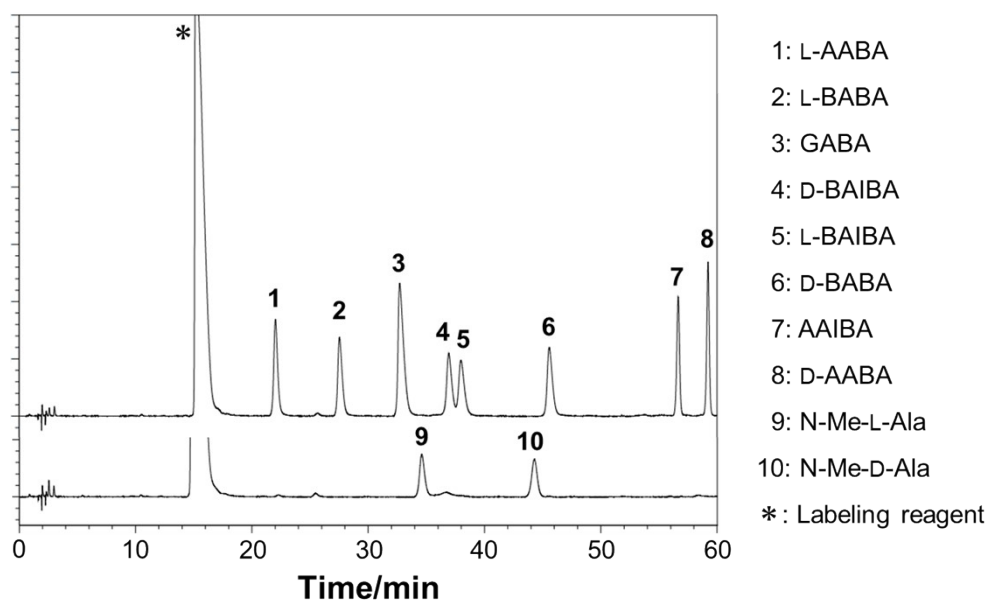

**Fig. S1** HPLC chromatograms of aminobutyric acids and *N*-methyl-DL-alanine labeled with L-FDVDA. HPLC was performed using a COSMOSIL 3C<sub>18</sub>-EB (2.0 mm I.D. × 150 mm, particle size; 3 μm) column for analysis with 30% methanol in H<sub>2</sub>O (containing 0.1% formic acid) using a linear gradient from 10% to 35% to 100% (0-40-60 min) with 60% methanol in H<sub>2</sub>O (containing 0.1% formic acid) for 60 min at a flow rate of 0.2 mL/min at 40 °C.
